# Supplementary material for: A revised model for activity–composition relations in solid and molten FePt alloys and a preliminary model for characterization of oxygen fugacity in high-pressure experiments
Source: Copernicus journal article supplement (doi:10.5194/ejm-35-789-2023), 2023-09-22
Supplement: Supplementary file 1 [file ejm-35-789-2023-supplement.zip]

Archive with 4 entries (4 files):
- ejm-35-789-2023-supplement-title-page.pdf
- SGTEIronPlatinum.xlsx
- Readme.docx
- HirschmannZhangFePt2023Fig4Calc.m
