# Supplementary material for: A revised model for activity–composition relations in solid and molten FePt alloys and a preliminary model for characterization of oxygen fugacity in high-pressure experiments
Source: Copernicus journal article supplement (doi:10.5194/ejm-35-789-2023), 2023-09-22
Supplement: Supplementary file 1 [file ejm-35-789-2023-supplement.zip › ejm-35-789-2023-supplement-title-page.pdf]

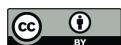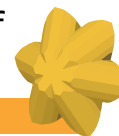

*Supplement of*

**A revised model for activity–composition relations in solid and molten FePt alloys and a preliminary model for characterization of oxygen fugacity in high-pressure experiments**

**Marc M. Hirschmann and Hongluo L. Zhang**

*Correspondence to:* Marc M. Hirschmann (mmh@umn.edu)

- ejm-35-789-2023-supplement-title-page.pdf
- HirschmannZhangFePt2023Fig4Calc.m
- Readme.docx
- SGTEIronPlatinum.xlsx

The copyright of individual parts of the supplement might differ from the article licence.
