# Supplementary material for: A revised model for activity–composition relations in solid and molten FePt alloys and a preliminary model for characterization of oxygen fugacity in high-pressure experiments
Source: Copernicus journal article supplement (doi:10.5194/ejm-35-789-2023), 2023-09-22
Supplement: Supplementary file 1 [file ejm-35-789-2023-supplement.zip › SGTEIronPlatinum.xlsx]

## Sheet: Data
	Fe fcc	Fe bcc	Fe HCP	Fe liq	Pt fcc	Pt bcc	Pt liq
T hi/lo	1811	1811	1811	1811	2041.5	2041.5	2041.5
a	-236.7	1225.7	-2480.08	13265.9	-9523.17	5746.83	19023.5
b T	132.416	124.134	136.725	117.576	161.53	159.13	32.9418
c TlnT	-24.6643	-23.5143	-24.6643	-23.5143	-30.2527	-30.2527	-12.3404
d T^2	-0.003752	-0.004398	-0.00375752	-0.00439752	0.00232167	0.00232167	-0.0115515
e T^3	-5.89269e-08	-5.8927e-08	-5.89269e-08	-5.89269e-08	-6.56946e-07	-6.56946e-07	9.31516e-07
f 1/T	77358.5	77359	77358.5	77358.5	-272106	-272106	-601426
g T^7	0	0	0	-3.67516e-21	0	0	0
h T^-9	0	0	0	0	0	0	0
a	-27097.4	-25383.6	-29340.8	-10838.8	-222048	-207048	1404.47
b T	300.253	299.312	304.562	291.302	1019.36	1016.96	205.859
c TlnT	-46	-46	-46	-46	-136.193	-136.193	-36.5
d T^2	0	0	0	0	0.0204549	0.0204548	0
e T^3	0	0	0	0	-7.59259e-07	-7.59259e-07	0
f 1/T	0	0	0	0	71539020	71549020	0
g T^7	0	0	0	0	0	0	0
h T^-9	2.78854e+31	2.29603e+31	2.78854e+31	0	0	0	0
Tmag	67	1043	0	0	0	0	0
B0	0.7	2.22	0	0	0	0	0
D	2.34246	1.55283	0	0	0	0	0

## Sheet: Sheet1
	Fe fcc	Fe bcc alpha	Fe HCP	Fe liq	Pt fcc	Pt bcc	Pt liq
T hi/lo	1811	1811	1811	1811	2041.5	2041.5	2041.5
a	-236.7	1225.7	-2480.08	13265.9	-9523.17	5746.83	19023.5
b T	132.416	124.134	136.725	117.576	161.53	159.13	32.9418
c TlnT	-24.6643	-23.5143	-24.6643	-23.5143	-30.2527	-30.2527	-12.3404
d T^2	-0.00375752	-0.00439752	-0.00375752	-0.00439752	0.00232167	0.00232167	-0.0115515
e T^3	-5.89269e-08	-5.89269e-08	-5.89269e-08	-5.89269e-08	-6.56946e-07	-6.56946e-07	9.31516e-07
f 1/T	77358.5	77358.5	77358.5	77358.5	-272106	-272106	-601426
g T^7	0	0	0	-3.67516e-21	0	0	0
h T^-9	0	0	0	0	0	0	0
a	-27097.4	-25383.6	-29340.8	-10838.8	-222048	-207048	1404.47
b T	300.253	299.312	304.562	291.302	1019.36	1016.96	205.859
c TlnT	-46	-46	-46	-46	-136.193	-136.193	-36.5
d T^2	0	0	0	0	0.0204549	0.0204548	0
e T^3	0	0	0	0	-7.59259e-07	-7.59259e-07	0
f 1/T	0	0	0	0	71539020	71549020	0
g T^7	0	0	0	0	0	0	0
h T^-9	2.78854e+31	2.29603e+31	2.78854e+31	0	0	0	0
Tmag	0	1043	0	0	0	0	0
B0	0	2.22	0	0	0	0	0
D	0	1.55283	0	0	0	0	0
								Delta G	Delta G
								liq-fcc Fe	liq-bcc Fe	liq-fcc Pt	liq bcc ptt	Stable Fe phase
600	-16689.3	-2.59332e+06	-16347.1	-7907.39	-28479.7	-14649.7	-13535.4	8781.93	2.58541e+06	14944.2	1114.21	bcc	600	2.57663e+06	#REF!
610	-17239.8	-1.75723e+06	-16854.5	-8528.9	-29076.3	-15270.3	-14233	8710.93	1.7487e+06	14843.4	1037.35	bcc	610	1.73999e+06	#REF!
620	-17795.1	-1.20133e+06	-17366.7	-9155.1	-29678	-15896	-14935	8640	1.19218e+06	14742.9	960.95	bcc	620	1.18354e+06	#REF!
630	-18355.1	-829193	-17883.5	-9785.94	-30284.5	-16526.5	-15641.5	8569.11	819407	14643	884.976	bcc	630	810838	#REF!
640	-18919.6	-578409	-18405	-10421.3	-30895.8	-17161.8	-16352.4	8498.29	567988	14543.4	809.407	bcc	640	559490	#REF!
650	-19488.8	-408326	-18931	-11061.3	-31511.9	-17801.9	-17067.7	8427.51	397265	14444.2	734.222	bcc	650	388837	#REF!
660	-20062.4	-292265	-19461.6	-11705.7	-32132.6	-18446.6	-17787.2	8356.78	280559	14345.4	659.397	bcc	660	272202	#REF!
670	-20640.6	-212603	-19996.6	-12354.5	-32757.9	-19095.9	-18511	8286.09	200249	14246.9	584.912	bcc	670	191963	#REF!
680	-21223.1	-157626	-20536.1	-13007.6	-33387.6	-19749.6	-19238.9	8215.44	144618	14148.7	510.745	bcc	680	136403	#REF!
690	-21810	-119492	-21079.8	-13665.1	-34021.8	-20407.8	-19971	8144.84	105827	14050.9	436.876	bcc	690	97681.8	#REF!
700	-22401.1	-92922.9	-21627.9	-14326.9	-34660.4	-21070.4	-20707.1	8074.27	78596	13953.3	363.286	bcc	700	70521.8	#REF!
710	-22996.6	-74343.4	-22180.3	-14992.8	-35303.2	-21737.2	-21447.3	8003.73	59350.6	13856	289.956	bcc	710	51346.8	#REF!
720	-23596.2	-61316.5	-22736.8	-15663	-35950.3	-22408.3	-22191.4	7933.22	45653.5	13758.9	216.866	bcc	720	37720.3	#REF!
730	-24200	-52171.9	-23297.5	-16337.3	-36601.6	-23083.6	-22939.6	7862.75	35834.6	13662	143.999	bcc	730	27971.9	#REF!
740	-24807.9	-45758	-23862.4	-17015.6	-37256.9	-23762.9	-23691.6	7792.3	28742.4	13565.3	71.3381	bcc	740	20950.1	#REF!
750	-25419.9	-41276.6	-24431.3	-17698.1	-37916.3	-24446.3	-24447.4	7721.87	23578.6	13468.9	-1.13426	bcc	750	15856.7	#REF!
760	-26035.9	-38171	-25004.2	-18384.5	-38579.7	-25133.7	-25207.1	7651.47	19786.5	13372.6	-73.4343	bcc	760	12135.1	#REF!
770	-26656	-36051	-25581.1	-19074.9	-39247	-25825	-25970.6	7581.08	16976.1	13276.4	-145.578	bcc	770	9395.05	#REF!
780	-27279.9	-34641.6	-26162	-19769.2	-39918.2	-26520.2	-26737.8	7510.71	14872.4	13180.4	-217.58	bcc	780	7361.69	#REF!
790	-27907.8	-33747.9	-26746.7	-20467.4	-40593.3	-27219.3	-27508.8	7440.36	13280.4	13084.5	-289.455	bcc	790	5840.09	#REF!
800	-28539.5	-33230.9	-27335.4	-21169.5	-41272.1	-27922.1	-28283.4	7370.02	12061.4	12988.8	-361.219	bcc	800	4691.39	#REF!
810	-29175.1	-32991.2	-27927.9	-21875.4	-41954.7	-28628.7	-29061.6	7299.69	11115.8	12893.1	-432.884	bcc	810	3816.14	#REF!
820	-29814.5	-32957.1	-28524.1	-22585.1	-42641	-29339	-29843.5	7229.37	10372.1	12797.5	-504.465	bcc	820	3142.69	#REF!
830	-30457.6	-33076.8	-29124.2	-23298.5	-43330.9	-30052.9	-30628.9	7159.05	9778.23	12702	-575.973	bcc	830	2619.18	#REF!
840	-31104.4	-33312.3	-29727.9	-24015.7	-44024.5	-30770.5	-31417.9	7088.74	9296.59	12606.6	-647.422	bcc	840	2207.84	#REF!
850	-31755	-33636	-30335.4	-24736.5	-44721.5	-31491.5	-32210.4	7018.43	8899.47	12511.2	-718.824	bcc	850	1881.04	#REF!
860	-32409.2	-34027.6	-30946.5	-25461.1	-45422.1	-32216.1	-33006.3	6948.13	8566.54	12415.8	-790.19	bcc	860	1618.41	#REF!
870	-33067	-34471.9	-31561.2	-26189.2	-46126.2	-32944.2	-33805.8	6877.82	8282.71	12320.5	-861.532	bcc	870	1404.89	#REF!
880	-33728.4	-34957.7	-32179.5	-26920.9	-46833.7	-33675.7	-34608.6	6807.51	8036.77	12225.1	-932.861	bcc	880	1229.26	#REF!
890	-34393.4	-35476.5	-32801.4	-27656.2	-47544.7	-34410.7	-35414.9	6737.19	7820.3	12129.8	-1004.19	bcc	890	1083.12	#REF!
900	-35061.9	-36022	-33426.8	-28395.1	-48259	-35149	-36224.5	6666.86	7626.98	12034.5	-1075.52	bcc	900	960.117	#REF!
910	-35733.9	-36589.4	-34055.8	-29137.4	-48976.6	-35890.6	-37037.4	6596.53	7451.99	11939.1	-1146.87	bcc	910	855.461	#REF!
920	-36409.4	-37174.9	-34688.2	-29883.3	-49697.5	-36635.5	-37853.7	6526.18	7291.66	11843.8	-1218.24	bcc	920	765.479	#REF!
930	-37088.4	-37775.7	-35324	-30632.6	-50421.6	-37383.6	-38673.3	6455.82	7143.18	11748.3	-1289.66	bcc	930	687.353	#REF!
940	-37770.7	-38389.6	-35963.3	-31385.3	-51149	-38135	-39496.1	6385.45	7004.35	11652.9	-1361.11	bcc	940	618.9	#REF!
950	-38456.5	-39014.9	-36605.9	-32141.4	-51879.6	-38889.6	-40322.2	6315.06	6873.48	11557.4	-1432.62	bcc	950	558.421	#REF!
960	-39145.6	-39650.2	-37251.9	-32900.9	-52613.3	-39647.3	-41151.5	6244.65	6749.23	11461.8	-1504.19	bcc	960	504.58	#REF!
970	-39838	-40294.4	-37901.3	-33663.8	-53350.2	-40408.2	-41984	6174.22	6630.54	11366.2	-1575.82	bcc	970	456.322	#REF!
980	-40533.8	-40946.6	-38554	-34430	-54090.1	-41172.1	-42819.7	6103.77	6516.57	11270.5	-1647.54	bcc	980	412.804	#REF!
990	-41232.8	-41606.2	-39209.9	-35199.5	-54833.1	-41939.1	-43658.5	6033.29	6406.64	11174.7	-1719.33	bcc	990	373.35	#REF!
1000	-41935.1	-42272.5	-39869.1	-35972.4	-55579.2	-42709.2	-44500.4	5962.78	6300.19	11078.8	-1791.22	bcc	1000	337.411	#REF!
1010	-42640.7	-42945.2	-40531.6	-36748.4	-56328.3	-43482.3	-45345.5	5892.25	6196.79	10982.8	-1863.2	bcc	1010	304.54	#REF!
1020	-43349.4	-43623.8	-41197.2	-37527.8	-57080.3	-44258.3	-46193.6	5821.69	6096.05	10886.7	-1935.28	bcc	1020	274.367	#REF!
1030	-44061.4	-44308	-41866.1	-38310.3	-57835.3	-45037.3	-47044.8	5751.09	5997.68	10790.5	-2007.47	bcc	1030	246.587	#REF!
1040	-44776.5	-44997.4	-42538.1	-39096	-58593.2	-45819.2	-47899	5680.46	5901.4	10694.2	-2079.78	bcc	1040
1050	-45494.8	-45692	-43213.3	-39885	-59354.1	-46604.1	-48756.3	5609.8	5807.01	10597.8	-2152.2	bcc	1050
1060	-46216.2	-46391.4	-43891.6	-40677.1	-60117.8	-47391.8	-49616.6	5539.09	5714.32	10501.2	-2224.75	bcc	1060
1070	-46940.6	-47095.5	-44573	-41472.3	-60884.4	-48182.4	-50479.8	5468.35	5623.16	10404.6	-2297.43	bcc	1070
1080	-47668.2	-47804.1	-45257.4	-42270.7	-61653.8	-48975.8	-51346	5397.56	5533.41	10307.8	-2370.25	bcc	1080
1090	-48398.8	-48517	-45945	-43072.1	-62426	-49772	-52215.2	5326.73	5444.93	10210.8	-2443.2	bcc	1090
1100	-49132.5	-49234.3	-46635.6	-43876.7	-63200.9	-50570.9	-53087.2	5255.85	5357.62	10113.7	-2516.3	bcc	1100
1110	-49869.2	-49955.7	-47329.2	-44684.3	-63978.7	-51372.7	-53962.2	5184.93	5271.39	10016.5	-2589.54	bcc	1110
1120	-50608.9	-50681.1	-48025.8	-45495	-64759.2	-52177.2	-54840.1	5113.95	5186.16	9919.06	-2662.94	bcc	1120
1130	-51351.6	-51410.5	-48725.4	-46308.7	-65542.4	-52984.4	-55720.9	5042.92	5101.86	9821.51	-2736.49	bcc	1130
1140	-52097.2	-52143.8	-49427.9	-47125.4	-66328.3	-53794.3	-56604.5	4971.84	5018.4	9723.8	-2810.2	bcc	1140
1150	-52845.8	-52880.9	-50133.4	-47945.1	-67116.8	-54606.8	-57490.9	4900.7	4935.75	9625.93	-2884.07	bcc	1150
1160	-53597.3	-53621.7	-50841.8	-48767.8	-67908.1	-55422.1	-58380.2	4829.5	4853.83	9527.9	-2958.1	bcc	1160
1170	-54351.8	-54366.1	-51553.1	-49593.5	-68701.9	-56239.9	-59272.2	4758.24	4772.6	9429.7	-3032.3	bcc	1170
1180	-55109.1	-55114.2	-52267.4	-50422.2	-69498.4	-57060.4	-60167.1	4686.92	4692.02	9331.33	-3106.67	bcc	1180
1190	-55869.3	-55865.8	-52984.5	-51253.7	-70297.5	-57883.5	-61064.7	4615.53	4612.04	9232.79	-3181.21	fcc	1190
1200	-56632.3	-56620.9	-53704.4	-52088.2	-71099.2	-58709.2	-61965.1	4544.07	4532.63	9134.07	-3255.93	fcc	1200
1210	-57398.2	-57379.4	-54427.2	-52925.7	-71903.4	-59537.4	-62868.2	4472.54	4453.74	9035.18	-3330.82	fcc	1210
1220	-58166.9	-58141.3	-55152.8	-53766	-72710.1	-60368.1	-63774	4400.94	4375.35	8936.1	-3405.9	fcc	1220
1230	-58938.4	-58906.6	-55881.2	-54609.2	-73519.4	-61201.4	-64682.6	4329.26	4297.42	8836.85	-3481.15	fcc	1230
1240	-59712.7	-59675.1	-56612.5	-55455.2	-74331.2	-62037.2	-65593.8	4257.51	4219.93	8737.42	-3556.58	fcc	1240
1250	-60489.8	-60447	-57346.4	-56304.1	-75145.5	-62875.5	-66507.7	4185.68	4142.85	8637.8	-3632.2	fcc	1250
1260	-61269.7	-61222	-58083.2	-57155.9	-75962.3	-63716.3	-67424.3	4113.76	4066.14	8538	-3708	fcc	1260
1270	-62052.3	-62000.3	-58822.7	-58010.5	-76781.5	-64559.5	-68343.5	4041.75	3989.8	8438.02	-3783.98	fcc	1270
1280	-62837.6	-62781.7	-59564.9	-58867.9	-77603.2	-65405.2	-69265.3	3969.66	3913.79	8337.85	-3860.15	fcc	1280
1290	-63625.6	-63566.2	-60309.9	-59728.1	-78427.3	-66253.3	-70189.8	3897.48	3838.1	8237.49	-3936.51	fcc	1290
1300	-64416.4	-64353.9	-61057.5	-60591.2	-79253.8	-67103.8	-71116.9	3825.2	3762.7	8136.95	-4013.05	fcc	1300
1310	-65209.8	-65144.5	-61807.9	-61457	-80082.7	-67956.7	-72046.5	3752.82	3687.58	8036.21	-4089.79	fcc	1310
1320	-66005.9	-65938.2	-62560.9	-62325.5	-80914	-68812	-72978.7	3680.35	3612.71	7935.29	-4166.71	fcc	1320
1330	-66804.7	-66735	-63316.5	-63196.9	-81747.7	-69669.7	-73913.5	3607.77	3538.08	7834.18	-4243.82	fcc	1330
1340	-67606.1	-67534.7	-64074.8	-64071	-82583.7	-70529.7	-74850.8	3535.09	3463.68	7732.89	-4321.11	fcc	1340
1350	-68410.1	-68337.3	-64835.8	-64947.8	-83422.1	-71392.1	-75790.7	3462.3	3389.49	7631.4	-4398.6	fcc	1350
1360	-69216.8	-69142.9	-65599.4	-65827.4	-84262.8	-72256.8	-76733.1	3389.39	3315.49	7529.73	-4476.27	fcc	1360
1370	-70026	-69951.3	-66365.5	-66709.7	-85105.8	-73123.8	-77678	3316.38	3241.66	7427.87	-4554.13	fcc	1370
1380	-70837.9	-70762.7	-67134.3	-67594.7	-85951.2	-73993.2	-78625.3	3243.24	3168.01	7325.82	-4632.18	fcc	1380
1390	-71652.3	-71576.9	-67905.7	-68482.4	-86798.8	-74864.8	-79575.2	3169.98	3094.5	7223.59	-4710.41	fcc	1390
1400	-72469.4	-72393.9	-68679.6	-69372.8	-87648.7	-75738.7	-80527.5	3096.59	3021.13	7121.17	-4788.83	fcc	1400
1410	-73288.9	-73213.7	-69456.1	-70265.9	-88500.9	-76614.9	-81482.3	3023.08	2947.89	7018.56	-4867.44	fcc	1410
1420	-74111	-74036.4	-70235.1	-71161.6	-89355.3	-77493.3	-82439.5	2949.43	2874.76	6915.77	-4946.23	fcc	1420
1430	-74935.7	-74861.8	-71016.6	-72060	-90212	-78374	-83399.2	2875.65	2801.74	6812.8	-5025.2	fcc	1430
1440	-75762.9	-75689.9	-71800.7	-72961.1	-91070.9	-79256.9	-84361.2	2801.73	2728.8	6709.65	-5104.35	fcc	1440
1450	-76592.6	-76520.8	-72587.3	-73864.9	-91932	-80142	-85325.7	2727.66	2655.95	6606.32	-5183.68	fcc	1450
1460	-77424.7	-77354.4	-73376.4	-74771.3	-92795.3	-81029.3	-86292.5	2653.45	2583.16	6502.8	-5263.2	fcc	1460
1470	-78259.4	-78190.8	-74168	-75680.3	-93660.9	-81918.9	-87261.8	2579.08	2510.44	6399.11	-5342.89	fcc	1470
1480	-79096.5	-79029.7	-74962	-76592	-94528.6	-82810.6	-88233.4	2504.56	2437.76	6295.25	-5422.75	fcc	1480
1490	-79936.2	-79871.4	-75758.5	-77506.3	-95398.5	-83704.5	-89207.3	2429.88	2365.12	6191.21	-5502.79	fcc	1490
1500	-80778.2	-80715.7	-76557.5	-78423.2	-96270.6	-84600.6	-90183.6	2355.04	2292.51	6087	-5583	fcc	1500
1510	-81622.7	-81562.6	-77358.9	-79342.7	-97144.8	-85498.8	-91162.2	2280.02	2219.92	5982.62	-5663.38	fcc	1510
1520	-82469.7	-82412.2	-78162.8	-80264.8	-98021.2	-86399.2	-92143.2	2204.84	2147.34	5878.07	-5743.93	fcc	1520
1530	-83319	-83264.3	-78969	-81189.6	-98899.8	-87301.8	-93126.4	2129.47	2074.77	5773.35	-5824.65	fcc	1530
1540	-84170.8	-84119.1	-79777.7	-82116.9	-99780.4	-88206.4	-94112	2053.93	2002.18	5668.47	-5905.53	fcc	1540
1550	-85025	-84976.4	-80588.8	-83046.8	-100663	-89113.2	-95099.8	1978.19	1929.58	5563.42	-5986.58	fcc	1550
1560	-85881.6	-85836.3	-81402.3	-83979.3	-101548	-90022.1	-96089.9	1902.27	1856.95	5458.22	-6067.78	fcc	1560
1570	-86740.5	-86698.7	-82218.2	-84914.4	-102435	-90933.1	-97082.2	1826.14	1784.28	5352.86	-6149.14	fcc	1570
1580	-87601.9	-87563.6	-83036.4	-85852	-103324	-91846.2	-98076.9	1749.82	1711.58	5247.35	-6230.65	fcc	1580
1590	-88465.6	-88431.1	-83857	-86792.3	-104215	-92761.4	-99073.7	1673.29	1638.82	5141.68	-6312.32	fcc	1590
1600	-89331.6	-89301.1	-84680	-87735.1	-105109	-93678.6	-100073	1596.54	1566	5035.87	-6394.13	fcc	1600
1610	-90200	-90173.5	-85505.3	-88680.4	-106004	-94598	-101074	1519.58	1493.11	4929.91	-6476.09	fcc	1610
1620	-91070.8	-91048.5	-86332.9	-89628.4	-106901	-95519.4	-102078	1442.4	1420.14	4823.81	-6558.19	fcc	1620
1630	-91943.8	-91925.9	-87162.9	-90578.8	-107801	-96442.8	-103083	1364.98	1347.09	4717.56	-6640.44	fcc	1630
1640	-92819.2	-92805.8	-87995.2	-91531.9	-108702	-97368.3	-104091	1287.33	1273.94	4611.18	-6722.82	fcc	1640
1650	-93696.9	-93688.1	-88829.8	-92487.5	-109606	-98295.9	-105101	1209.44	1200.69	4504.66	-6805.34	fcc	1650
1660	-94576.9	-94572.9	-89666.7	-93445.6	-110511	-99225.4	-106113	1131.3	1127.33	4398.02	-6887.98	fcc	1660
1670	-95459.2	-95460.1	-90505.9	-94406.3	-111419	-100157	-107128	1052.91	1053.84	4291.24	-6970.76	bcc	1670
1680	-96343.7	-96349.7	-91347.3	-95369.5	-112329	-101091	-108144	974.26	980.23	4184.34	-7053.66	bcc	1680
1690	-97230.6	-97241.7	-92191.1	-96335.2	-113240	-102026	-109163	895.343	906.479	4077.32	-7136.68	bcc	1690
1700	-98119.7	-98136.1	-93037.1	-97303.6	-114154	-102964	-110184	816.153	832.582	3970.18	-7219.82	bcc	1700
1710	-99011.1	-99032.9	-93885.4	-98274.4	-115069	-103903	-111207	736.684	758.531	3862.93	-7303.07	bcc	1710
1720	-99904.7	-99932.1	-94735.9	-99247.8	-115987	-104845	-112232	656.928	684.315	3755.57	-7386.43	bcc	1720
1730	-100801	-100834	-95588.7	-100224	-116907	-105789	-113259	576.878	609.927	3648.1	-7469.9	bcc	1730
1740	-101699	-101738	-96443.7	-101202	-117828	-106734	-114288	496.528	535.357	3540.52	-7553.48	bcc	1740
1750	-102599	-102644	-97300.9	-102183	-118752	-107682	-115319	415.87	460.598	3432.85	-7637.15	bcc	1750
1760	-103502	-103552	-98160.4	-103167	-119677	-108631	-116352	334.896	385.638	3325.08	-7720.92	bcc	1760
1770	-104406	-104463	-99022.1	-104153	-120605	-109583	-117388	253.599	310.47	3217.22	-7804.78	bcc	1770
1780	-105313	-105376	-99885.9	-105141	-121534	-110536	-118425	171.97	235.084	3109.28	-7888.72	bcc	1780
1790	-106222	-106292	-100752	-106132	-122466	-111492	-119464	90.0026	159.472	3001.25	-7972.75	bcc	1790
1800	-107134	-107210	-101620	-107126	-123399	-112449	-120506	7.68747	83.622	2893.14	-8056.86	bcc	1800
1810	-108047	-108130	-102491	-108122	-124334	-113408	-121549	-74.9834	7.52629	2784.95	-8141.05	bcc	1810
1820	-108962	-109052	-103362	-109121	-125271	-114369	-122595	-158.726	-68.7107	2676.69	-8225.31	liq	1820
1830	-109880	-109977	-104237	-110122	-126210	-115332	-123642	-242.107	-145.301	2568.37	-8309.63	liq	1830
1840	-110800	-110904	-105114	-111126	-127151	-116297	-124691	-325.814	-222.118	2459.99	-8394.01	liq	1840
1850	-111723	-111833	-105993	-112132	-128094	-117264	-125743	-409.828	-299.147	2351.54	-8478.46	liq	1850
1860	-112647	-112765	-106875	-113141	-129039	-118233	-126796	-494.131	-376.376	2243.05	-8562.95	liq	1860
1870	-113574	-113699	-107758	-114152	-129986	-119204	-127851	-578.706	-453.792	2134.5	-8647.5	liq	1870
1880	-114503	-114635	-108644	-115166	-130934	-120176	-128909	-663.538	-531.383	2025.91	-8732.09	liq	1880
1890	-115434	-115573	-109532	-116182	-131885	-121151	-129968	-748.612	-609.139	1917.28	-8816.72	liq	1890
1900	-116367	-116514	-110422	-117201	-132837	-122127	-131029	-833.914	-687.048	1808.61	-8901.39	liq	1900
1910	-117302	-117457	-111315	-118222	-133792	-123106	-132092	-919.432	-765.102	1699.92	-8986.08	liq	1910
1920	-118240	-118402	-112209	-119245	-134748	-124086	-133157	-1005.15	-843.292	1591.19	-9070.81	liq	1920
1930	-119180	-119350	-113106	-120271	-135706	-125068	-134224	-1091.07	-921.609	1482.45	-9155.55	liq	1930
1940	-120122	-120299	-114005	-121299	-136666	-126052	-135292	-1177.16	-1000.05	1373.69	-9240.31	liq	1940
1950	-121066	-121251	-114906	-122330	-137628	-127038	-136363	-1263.43	-1078.59	1264.92	-9325.08	liq	1950
1960	-122013	-122206	-115810	-123363	-138591	-128025	-137435	-1349.86	-1157.25	1156.14	-9409.86	liq	1960
1970	-122962	-123162	-116715	-124398	-139557	-129015	-138510	-1436.44	-1236	1047.36	-9494.64	liq	1970
1980	-123913	-124121	-117623	-125436	-140524	-130006	-139586	-1523.16	-1314.85	938.585	-9579.41	liq	1980
1990	-124866	-125082	-118533	-126476	-141493	-130999	-140664	-1610.03	-1393.78	829.818	-9664.18	liq	1990
2000	-125821	-126045	-119445	-127518	-142465	-131995	-141743	-1697.02	-1472.79	721.065	-9748.94	liq	2000
2010	-126778	-127011	-120360	-128562	-143437	-132991	-142825	-1784.13	-1551.88	612.331	-9833.67	liq	2010
2020	-127738	-127978	-121276	-129609	-144412	-133990	-143909	-1871.36	-1631.04	503.62	-9918.38	liq	2020
2030	-128700	-128948	-122195	-130658	-145389	-134991	-144994	-1958.7	-1710.28	394.94	-10003.1		2030
2040	-129664	-129920	-123116	-131710	-146367	-135993	-146081	-2046.15	-1789.57	286.293	-10087.7		2040
2050	-130630	-130894	-124039	-132763	-147077	-136993	-147170	-2133.69	-1868.92	-92.3175	-10176.7		2050
2060	-131598	-131871	-124964	-133819	-148060	-137999	-148260	-2221.33	-1948.33	-200.879	-10261.3		2060
2070	-132568	-132850	-125891	-134877	-149043	-139007	-149353	-2309.05	-2027.8	-309.39	-10345.8		2070
2080	-133541	-133830	-126820	-135938	-150029	-140017	-150447	-2396.86	-2107.31	-417.846	-10430.2		2080
2090	-134515	-134813	-127752	-137000	-151017	-141028	-151543	-2484.75	-2186.87	-526.242	-10514.6		2090
2100	-135492	-135798	-128686	-138065	-152006	-142042	-152641	-2572.72	-2266.47	-634.575	-10598.9		2100
2110	-136471	-136786	-129621	-139132	-152997	-143057	-153740	-2660.75	-2346.11	-742.839	-10683.1		2110
2120	-137452	-137775	-130559	-140201	-153990	-144074	-154841	-2748.86	-2425.79	-851.032	-10767.3		2120
2130	-138435	-138767	-131499	-141272	-154985	-145093	-155944	-2837.03	-2505.51	-959.149	-10851.3		2130
2140	-139420	-139760	-132442	-142346	-155981	-146113	-157049	-2925.26	-2585.26	-1067.19	-10935.4		2140
2150	-140408	-140756	-133386	-143421	-156980	-147136	-158155	-3013.55	-2665.05	-1175.14	-11019.3		2150
2160	-141397	-141754	-134332	-144499	-157980	-148160	-159263	-3101.89	-2744.86	-1283.01	-11103.1		2160
2170	-142389	-142754	-135280	-145579	-158982	-149186	-160373	-3190.29	-2824.7	-1390.79	-11186.9		2170
2180	-143382	-143756	-136231	-146661	-159985	-150213	-161484	-3278.73	-2904.57	-1498.48	-11270.6		2180
2190	-144378	-144760	-137183	-147745	-160991	-151243	-162597	-3367.23	-2984.46	-1606.08	-11354.1		2190
2200	-145375	-145767	-138138	-148831	-161998	-152274	-163712	-3455.76	-3064.38	-1713.58	-11437.6		2200
2210	-146375	-146775	-139094	-149919	-163007	-153307	-164828	-3544.35	-3144.31	-1820.98	-11521		2210
2220	-147377	-147786	-140053	-151010	-164018	-154342	-165946	-3632.97	-3224.27	-1928.28	-11604.2		2220
2230	-148381	-148798	-141014	-152102	-165030	-155378	-167066	-3721.63	-3304.25	-2035.47	-11687.4		2230
2240	-149386	-149812	-141977	-153197	-166044	-156417	-168187	-3810.33	-3384.24	-2142.56	-11770.5		2240
2250	-150394	-150829	-142941	-154293	-167060	-157456	-169310	-3899.06	-3464.26	-2249.54	-11853.4		2250
2260	-151404	-151848	-143908	-155392	-168078	-158498	-170434	-3987.83	-3544.28	-2356.42	-11936.3		2260
2270	-152416	-152868	-144877	-156493	-169097	-159542	-171561	-4076.63	-3624.33	-2463.18	-12019		2270
2280	-153430	-153891	-145847	-157595	-170119	-160587	-172688	-4165.46	-3704.38	-2569.83	-12101.7		2280
2290	-154446	-154915	-146820	-158700	-171141	-161634	-173818	-4254.32	-3784.45	-2676.37	-12184.2		2290
2300	-155463	-155942	-147795	-159807	-172166	-162682	-174949	-4343.2	-3864.53	-2782.8	-12266.6		2300
2310	-156483	-156971	-148772	-160915	-173192	-163732	-176081	-4432.12	-3944.62	-2889.11	-12348.9		2310
2320	-157505	-158001	-149750	-162026	-174220	-164784	-177215	-4521.05	-4024.73	-2995.3	-12431		2320
2330	-158529	-159034	-150731	-163139	-175250	-165838	-178351	-4610.02	-4104.84	-3101.38	-12513.1		2330
2340	-159554	-160068	-151713	-164253	-176281	-166893	-179488	-4699	-4184.96	-3207.34	-12595		2340
2350	-160582	-161105	-152698	-165370	-177314	-167950	-180627	-4788.01	-4265.09	-3313.18	-12676.8		2350
2360	-161611	-162143	-153684	-166488	-178349	-169009	-181768	-4877.03	-4345.23	-3418.9	-12758.5		2360
2370	-162643	-163183	-154673	-167609	-179385	-170069	-182909	-4966.08	-4425.37	-3524.5	-12840.1		2370
2380	-163676	-164226	-155663	-168731	-180423	-171131	-184053	-5055.15	-4505.52	-3629.98	-12921.6		2380
2390	-164711	-165270	-156655	-169856	-181463	-172195	-185198	-5144.23	-4585.68	-3735.34	-13002.9		2390
2400	-165749	-166316	-157649	-170982	-182504	-173260	-186344	-5233.33	-4665.85	-3840.57	-13084.1		2400
2410	-166788	-167364	-158645	-172110	-183547	-174327	-187492	-5322.45	-4746.02	-3945.69	-13165.2		2410
2420	-167829	-168414	-159643	-173240	-184591	-175396	-188642	-5411.58	-4826.19	-4050.69	-13246.2		2420
2430	-168872	-169466	-160643	-174372	-185638	-176466	-189793	-5500.73	-4906.37	-4155.56	-13327		2430
2440	-169916	-170520	-161645	-175506	-186685	-177538	-190946	-5589.9	-4986.56	-4260.31	-13407.8
2450	-170963	-171575	-162648	-176642	-187735	-178611	-192100	-5679.07	-5066.74	-4364.95	-13488.4
2460	-172011	-172633	-163654	-177780	-188786	-179686	-193255	-5768.26	-5146.94	-4469.46	-13568.9
2470	-173062	-173692	-164661	-178919	-189839	-180763	-194412	-5857.47	-5227.13	-4573.85	-13649.2
2480	-174114	-174753	-165670	-180061	-190893	-181841	-195571	-5946.68	-5307.33	-4678.11	-13729.5
2490	-175168	-175816	-166681	-181204	-191949	-182921	-196731	-6035.91	-5387.53	-4782.26	-13809.6
2500	-176224	-176881	-167694	-182349	-193006	-184003	-197892	-6125.14	-5467.73	-4886.29	-13889.6
